# Supplementary material for: Gating transitions and modulation of a hetero-octameric AMPA glutamate receptor
Source: Research Square preprint supplement (doi:10.21203/rs.3.rs-119872/v1), 2020-12-07
Supplement: Supplementary file 1 [file b7dbe0182bfba79f63a76972.pdf]

# Supplementary information

## **Gating transitions and modulation of a hetero-octameric AMPA glutamate receptor**

Danyang Zhang<sup>1</sup>, Jake F. Watson<sup>1†</sup>, Peter M. Matthews<sup>1</sup>, Ondrej Cais<sup>1</sup> and Ingo H.  
Greger<sup>1\*</sup>

<sup>1</sup>Neurobiology Division, MRC Laboratory of Molecular Biology, Cambridge UK.

<sup>†</sup> IST Austria, Am Campus 1, 3400 Klosterneuburg, Austria.

\*Correspondence to: [ig@mrc-lmb.cam.ac.uk](mailto:ig@mrc-lmb.cam.ac.uk)

### 1. Supplementary Videos

**Supplementary Video 1. Gating changes of A1/2\_γ8/C2 on activation.**

Conformational changes of GluA1 and GluA2 from resting to active state are shown first from side view and then from top view. The model is coloured with the same scheme in Fig1.

**Supplementary Video 2. Movements of auxiliary subunits in A1/2\_γ8/C2 on receptor activation.**

Movements of γ8 and CNIH2 from resting to active state are shown first from side view and then from bottom view. The model is coloured with the same scheme in Fig1.

**Supplementary Video 3. Normal model analysis of A1/2\_γ8/C2 at active state.**

Energetically favorable motion modes of A1/2\_γ8/C2 at active state via normal mode analysis (Mode 19) are shown from side view (top) and bottom view (bottom). The model is coloured with the same scheme in Fig1.
